# Supplementary material for: Multiple investigations of aqueous Eu(iii)–oxalate complexes: the reduction in coordination number and validation of spectral linear correlation
Source: Royal Society of Chemistry journal article supplement (doi:10.1039/d1dt00609f), 2021-01-01
Supplement: d1dt00609f1.pdf [file d1dt00609f1.pdf]

## Supporting Information

The supporting information contains 9 pages, including 11 tables and 2 figure.

**Table S1. Summary of the thermodynamic constants from the databases**

| Parameter                                        | Value | Reference    |
|--------------------------------------------------|-------|--------------|
| $\text{pK}_{a1} (\text{H}_2\text{Ox})$           | 1.19  | ThermoChimie |
| $\text{pK}_{a2} (\text{HOx}^-)$                  | 3.83  | ThermoChimie |
| $\log \beta_{1,1} (\text{Eu}(\text{OH})_2^{2+})$ | -7.64 | PSINA        |
| $\log \beta_{1,2} (\text{Eu}(\text{OH})_2^{2+})$ | -15.1 | PSINA        |
| $\log \beta_{1,3} (\text{Eu}(\text{OH})_3)$      | -23.7 | PSINA        |
| $\log k_1 (\text{Eu}(\text{Ox})^+)$              | 6.55  | ThermoChimie |
| $\log k_2 (\text{Eu}(\text{Ox})_2^-)$            | 10.93 | ThermoChimie |
| $\log k_3 (\text{Eu}(\text{Ox})_3^{3-})$         | 12.48 | ThermoChimie |

**Table S2. Fractional weights of various species of Eu(III)(10  $\mu\text{M}$ ) or Ox(10 mM) under different pH obtained from theoretical calculation in 0.1 M  $\text{NaClO}_4$ , 25  $^\circ\text{C}$**

| pH  | $\text{Eu}^{3+}_{(\text{aq})}$ | $\text{Eu}(\text{OH})_2^{2+}$ | $\text{Eu}(\text{OH})_2^+$ | $\text{Eu}(\text{OH})_3$ | $\text{HOx}^-$ | $\text{Ox}^{2-}$ |
|-----|--------------------------------|-------------------------------|----------------------------|--------------------------|----------------|------------------|
| 3.0 | 100                            | \*                            | \                          | \                        | 87.5           | 10.8             |
| 3.2 | 100                            | \                             | \                          | \                        | 82.7           | 16.3             |
| 3.4 | 100                            | \                             | \                          | \                        | 75.7           | 23.7             |
| 3.6 | 100                            | \                             | \                          | \                        | 66.5           | 33.2             |
| 3.8 | 100                            | \                             | \                          | \                        | 55.7           | 44.2             |
| 4.0 | 100                            | \                             | \                          | \                        | 44.1           | 55.8             |
| 4.2 | 100                            | \                             | \                          | \                        | 33.2           | 66.8             |
| 4.4 | 100                            | \                             | \                          | \                        | 23.8           | 76.2             |
| 4.6 | 100                            | \                             | \                          | \                        | 16.4           | 83.6             |
| 4.8 | 100                            | \                             | \                          | \                        | 11.0           | 89.0             |
| 5.0 | 99.9                           | \                             | \                          | \                        | 7.2            | 92.8             |
| 5.2 | 99.9                           | 0.1                           | \                          | \                        | 4.7            | 95.3             |
| 5.4 | 99.8                           | 0.2                           | \                          | \                        | 3.0            | 97.0             |
| 5.6 | 99.7                           | 0.3                           | \                          | \                        | 1.9            | 98.1             |
| 5.8 | 99.6                           | 0.4                           | \                          | \                        | 1.2            | 98.8             |
| 6.0 | 99.3                           | 0.7                           | \                          | \                        | 0.8            | 99.2             |
| 6.2 | 98.9                           | 1.0                           | \                          | \                        | 0.5            | 99.5             |

|     |      |      |      |      |     |      |
|-----|------|------|------|------|-----|------|
| 6.4 | 98.3 | 1.6  | \    | \    | 0.3 | 99.7 |
| 6.6 | 97.3 | 2.6  | 0.2  | \    | 0.2 | 99.8 |
| 6.8 | 95.6 | 4.0  | 0.4  | \    | 0.1 | 99.9 |
| 7.0 | 92.9 | 6.1  | 1.0  | \    | \   | 99.9 |
| 7.2 | 88.3 | 9.2  | 2.4  | \    | \   | 100  |
| 7.4 | 80.8 | 13.4 | 5.5  | 0.3  | \   | 100  |
| 7.6 | 69.1 | 18.1 | 11.9 | 0.9  | \   | 100  |
| 7.8 | 52.6 | 21.9 | 22.7 | 2.8  | \   | 100  |
| 8.0 | 33.9 | 22.3 | 36.7 | 7.2  | \   | 100  |
| 8.2 | 17.8 | 18.7 | 48.5 | 15.0 | \   | 100  |
| 8.4 | 7.8  | 12.9 | 53.2 | 26.1 | \   | 100  |
| 8.6 | 2.9  | 7.7  | 50.3 | 39.1 | \   | 100  |
| 8.8 | 1.0  | 4.1  | 42.5 | 52.4 | \   | 100  |
| 9.0 | 0.3  | 2.0  | 33.1 | 64.6 | \   | 100  |
| 9.2 | \    | 0.9  | 24.2 | 74.8 | \   | 100  |
| 9.4 | \    | 0.4  | 16.9 | 82.6 | \   | 100  |

\*Less than 0.1%

**Table S3. Fractional weights(%) of various species of Eu(III)–Ox complexes obtained from theoretical calculation for the 10 μM Eu(III) and various concentration of Ox in 0.1 M NaClO<sub>4</sub> at pH 5.5, 25 °C**

| [Ox]/mM | Eu <sup>3+</sup> | Eu(Ox) <sup>+</sup> | Eu(Ox) <sub>2</sub> <sup>-</sup> | Eu(Ox) <sub>3</sub> <sup>3-</sup> |
|---------|------------------|---------------------|----------------------------------|-----------------------------------|
| 0       | 100              | \*                  | \                                | \                                 |
| 0.005   | 72.7             | 26.7                | 0.5                              | \                                 |
| 0.01    | 53.1             | 44.9                | 1.9                              | \                                 |
| 0.02    | 30.6             | 62.7                | 6.6                              | \                                 |
| 0.05    | 10.5             | 67.3                | 22.1                             | \                                 |
| 0.1     | 3.9              | 55.4                | 40.3                             | 0.3                               |
| 0.2     | 1.3              | 38.3                | 59.4                             | 1.0                               |
| 0.5     | 0.2              | 19.1                | 77.2                             | 3.5                               |
| 1       | \                | 10.0                | 82.2                             | 7.7                               |
| 2       | \                | 4.9                 | 79.9                             | 15.2                              |
| 5       | \                | 1.6                 | 65.9                             | 32.5                              |
| 10      | \                | 0.6                 | 48.9                             | 50.4                              |
| 20      | \                | 0.2                 | 31.0                             | 68.8                              |
| 30      | \                | 0.1                 | 22.0                             | 77.9                              |
| 50      | \                | \                   | 13.3                             | 86.7                              |

\*Less than 0.1%

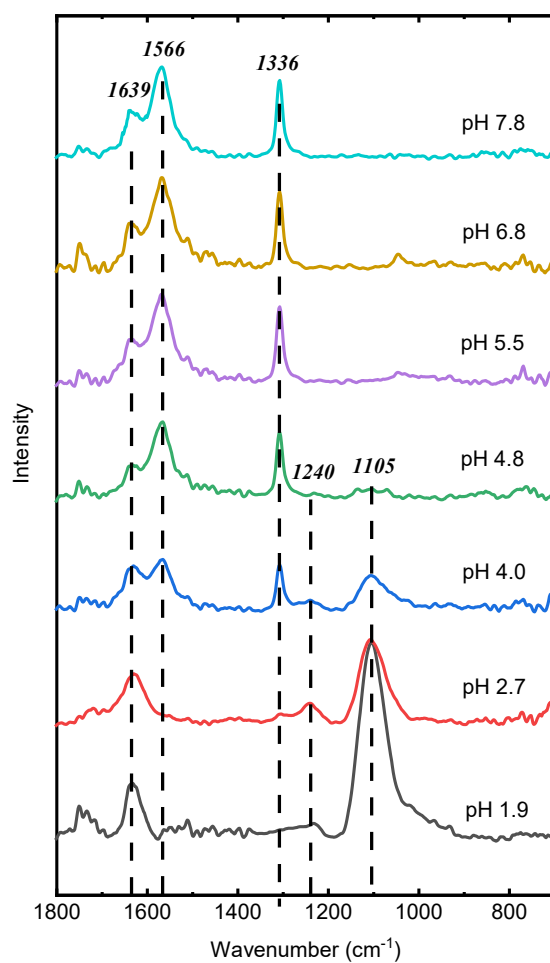

**Fig. S1** ATR-FTIR spectral of aqueous Ox (10 mM) at different solution pH values. All ATR-FTIR spectra were recorded for 2048 scans in the range of 600 to 2000  $\text{cm}^{-1}$  per sample with the spectrum spotlight 200 FT-IR microscopy (PerkinElmer, U.S.) equipping with the ATR accessory in air atmosphere at room temperature ( $298 \pm 2$  K).

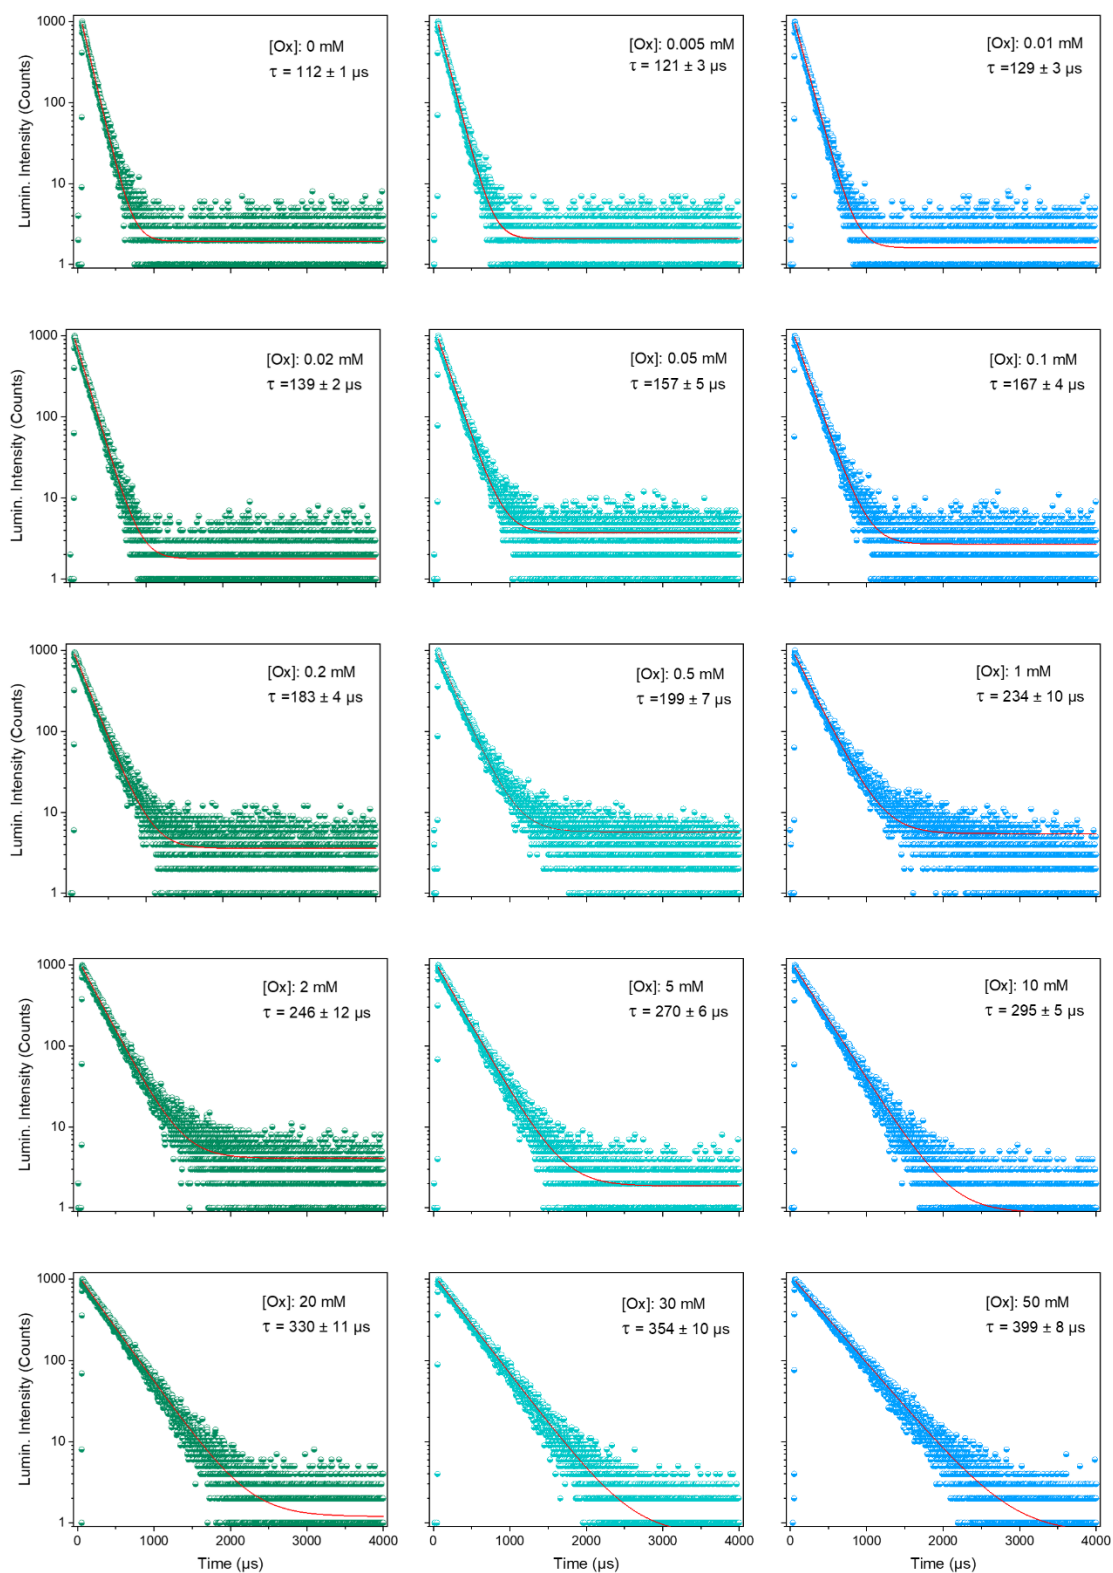

**Fig. S2** Representative luminescence decay curves of the samples comprising  $10 \mu\text{M}$  Eu(III) and various concentration of Ox in  $0.1 \text{ M NaClO}_4$  at pH 5.5. The red lines are the fitting lines;  $\lambda_{ex} = 394 \text{ nm}$ ,  $\lambda_{em} = 616 \text{ nm}$ .

**Table S4a. Detailed structural and electronic information of  $\text{Eu}(\text{H}_2\text{O})_9^{3+}$** 

| Atom | X         | Y         | Z         | Mulliken charge |
|------|-----------|-----------|-----------|-----------------|
| Eu   | -0.003730 | -0.049213 | -0.016315 | 1.944           |
| O    | -1.924820 | -1.720940 | 0.034408  | -0.656          |
| H    | -2.756816 | -1.260482 | -0.127878 | 0.391           |
| O    | 1.753365  | 0.929697  | 1.566635  | -0.657          |
| H    | 1.943618  | 0.270452  | 2.245190  | 0.388           |
| O    | -1.769756 | 1.012114  | 1.515041  | -0.659          |
| H    | -1.708313 | 1.925027  | 1.205898  | 0.389           |
| O    | -0.055371 | 2.686977  | -0.026639 | -0.692          |
| H    | -0.145773 | 2.926142  | -0.955595 | 0.393           |
| O    | 1.883418  | 0.888077  | -1.474332 | -0.659          |
| H    | 2.049763  | 1.813021  | -1.261766 | 0.385           |
| O    | -1.807684 | 0.907898  | -1.542223 | -0.656          |
| H    | -1.919623 | 0.214960  | -2.205021 | 0.392           |
| O    | -0.076970 | -1.316003 | -2.235545 | -0.672          |
| H    | 0.789979  | -1.341766 | -2.654997 | 0.395           |
| O    | 1.905677  | -1.745892 | 0.039732  | -0.659          |
| H    | 2.645854  | -1.334934 | 0.500874  | 0.389           |
| O    | -0.139130 | -1.354955 | 2.201703  | -0.672          |
| H    | 0.698906  | -1.780416 | 2.406466  | 0.394           |
| H    | -1.929018 | -1.942949 | 0.974815  | 0.391           |
| H    | 2.582298  | 1.037752  | 1.086197  | 0.388           |
| H    | -2.659145 | 0.717003  | 1.287291  | 0.391           |
| H    | 0.803129  | 3.025571  | 0.245858  | 0.388           |
| H    | 2.706354  | 0.431167  | -1.262941 | 0.388           |
| H    | -2.647378 | 0.953978  | -1.072576 | 0.390           |
| H    | -0.306031 | -2.23659  | -2.060255 | 0.397           |
| H    | 2.221357  | -1.898895 | -0.859193 | 0.392           |
| H    | -0.284026 | -0.714428 | 2.905248  | 0.397           |

**Table S4b. Detailed bond length and bond order information of  $\text{Eu}(\text{H}_2\text{O})_9^{3+}$** 

| Central atom | Coordination atom | Bond length | Mayer bond order |
|--------------|-------------------|-------------|------------------|
| Eu           | O2                | 2.547       | 0.240            |
| Eu           | O4                | 2.560       | 0.222            |
| Eu           | O6                | 2.567       | 0.230            |
| Eu           | O8                | 2.737       | 0.139            |
| Eu           | O10               | 2.562       | 0.216            |

|    |     |       |       |
|----|-----|-------|-------|
| Eu | O12 | 2.549 | 0.234 |
| Eu | O14 | 2.556 | 0.206 |
| Eu | O16 | 2.555 | 0.225 |
| Eu | O18 | 2.577 | 0.202 |

**Table S5a. Detailed structural and electronic information of  $\text{Eu}(\text{Ox})_1(\text{H}_2\text{O})_7^+$**

| Atom | X         | Y         | Z         | Mulliken charge |
|------|-----------|-----------|-----------|-----------------|
| Eu   | 0.547334  | 0.012203  | 0.000373  | 1.777           |
| O    | 1.631919  | 1.826933  | 1.433156  | -0.664          |
| H    | 2.535891  | 1.534722  | 1.616065  | 0.395           |
| O    | -0.094590 | -0.184420 | 2.525187  | -0.667          |
| H    | -1.050730 | -0.329380 | 2.539377  | 0.392           |
| O    | 2.252048  | -1.160830 | 1.557941  | -0.663          |
| H    | 2.109299  | -2.044070 | 1.182935  | 0.388           |
| O    | 2.741292  | -0.041730 | -1.335610 | -0.672          |
| H    | 2.410095  | -0.323970 | -2.200930 | 0.393           |
| O    | 0.762104  | 2.349552  | -1.186700 | -0.676          |
| H    | -0.190220 | 2.523152  | -1.105070 | 0.383           |
| O    | 0.842060  | -2.478300 | -0.616420 | -0.666          |
| H    | 0.986290  | -2.540130 | -1.570810 | 0.391           |
| O    | -0.074400 | -0.282770 | -2.478950 | -0.668          |
| H    | -0.742600 | -0.982660 | -2.505470 | 0.391           |
| H    | -0.555310 | 0.511526  | -2.751300 | 0.389           |
| H    | 0.915524  | 2.251477  | -2.136390 | 0.395           |
| H    | 1.728894  | 2.485064  | 0.726605  | 0.390           |
| H    | 0.019989  | 0.740969  | 2.787580  | 0.394           |
| H    | 3.247327  | -0.804070 | -1.020970 | 0.394           |
| H    | -0.118060 | -2.604270 | -0.504650 | 0.379           |
| H    | 1.632074  | -1.121430 | 2.306306  | 0.387           |
| C    | -2.577160 | -0.785060 | 0.070955  | 0.293           |
| O    | -1.418130 | -1.314770 | 0.165211  | -0.552          |
| O    | -3.644620 | -1.385150 | -0.028330 | -0.524          |
| C    | -2.575270 | 0.771127  | 0.085355  | 0.283           |
| O    | -3.64600  | 1.372681  | 0.043740  | -0.525          |
| O    | -1.413680 | 1.301047  | 0.130192  | -0.535          |

**Table S5b. Detailed bond length and bond order information of Eu(Ox)<sub>1</sub>(H<sub>2</sub>O)<sub>7</sub><sup>+</sup>**

| Central atom | Coordination atom | Bond length | Mayer bond order |
|--------------|-------------------|-------------|------------------|
| Eu           | O2                | 2.554       | 0.227            |
| Eu           | O4                | 2.613       | 0.200            |
| Eu           | O6                | 2.590       | 0.239            |
| Eu           | O8                | 2.569       | 0.209            |
| Eu           | O10               | 2.630       | 0.193            |
| Eu           | O12               | 2.583       | 0.220            |
| Eu           | O14               | 2.573       | 0.205            |
| Eu           | O24               | 2.377       | 0.328            |
| Eu           | O28               | 2.350       | 0.346            |

**Table S6a. Detailed structural and electronic information of Eu(Ox)<sub>2</sub>(H<sub>2</sub>O)<sub>4</sub><sup>-</sup>**

| Atom | X         | Y         | Z         | Mulliken charge |
|------|-----------|-----------|-----------|-----------------|
| Eu   | 0.031584  | -0.467700 | -0.089890 | 1.805           |
| O    | 0.382352  | -0.774980 | 2.456897  | -0.672          |
| H    | -0.309850 | -0.104620 | 2.600500  | 0.380           |
| O    | -1.198340 | -2.594060 | 0.713645  | -0.669          |
| H    | -2.106420 | -2.330900 | 0.503181  | 0.387           |
| O    | 0.790681  | -2.562860 | -1.432510 | -0.683          |
| H    | 1.678251  | -2.416130 | -1.058350 | 0.378           |
| O    | 0.035397  | 0.482468  | -2.426740 | -0.687          |
| H    | -0.087420 | 1.429325  | -2.151820 | 0.374           |
| O    | -0.256410 | 2.890627  | -1.279350 | -0.724          |
| H    | -1.108930 | 2.770555  | -0.837610 | 0.381           |
| H    | 0.389849  | 2.565380  | -0.610230 | 0.366           |
| H    | 1.204387  | -0.324880 | 2.696017  | 0.389           |
| H    | -1.141630 | -2.514020 | 1.676670  | 0.389           |
| H    | -0.864080 | 0.202279  | -2.655400 | 0.379           |
| H    | 0.382045  | -3.209480 | -0.838100 | 0.387           |
| C    | -3.118970 | 0.239571  | -0.401450 | 0.292           |
| O    | -2.200680 | -0.438120 | -0.968570 | -0.556          |
| O    | -4.265180 | 0.405325  | -0.820880 | -0.539          |
| C    | -2.710610 | 0.897179  | 0.951472  | 0.284           |
| O    | -3.565660 | 1.478757  | 1.617719  | -0.532          |
| O    | -1.478500 | 0.766661  | 1.261939  | -0.555          |
| C    | 3.250774  | -0.042400 | 0.159778  | 0.296           |
| O    | 2.378882  | -0.957130 | -0.013360 | -0.554          |

|   |          |           |          |        |
|---|----------|-----------|----------|--------|
| O | 4.469879 | -0.198580 | 0.208042 | -0.533 |
| C | 2.670775 | 1.395767  | 0.308605 | 0.316  |
| O | 3.442784 | 2.344425  | 0.419594 | -0.529 |
| O | 1.392556 | 1.464598  | 0.292062 | -0.572 |

**Table S6b. Detailed bond length and bond order information of  $\text{Eu}(\text{Ox})_2(\text{H}_2\text{O})_4^-$**

| Central atom | Coordination atom | Bond length | Mayer bond order |
|--------------|-------------------|-------------|------------------|
| Eu           | O2                | 2.589       | 0.219            |
| Eu           | O4                | 2.585       | 0.203            |
| Eu           | O6                | 2.602       | 0.207            |
| Eu           | O8                | 2.523       | 0.250            |
| Eu           | O18               | 2.399       | 0.304            |
| Eu           | O22               | 2.373       | 0.309            |
| Eu           | O24               | 2.399       | 0.298            |
| Eu           | O28               | 2.394       | 0.297            |

**Table S7a. Detailed structural and electronic information of  $\text{Eu}(\text{Ox})_3(\text{H}_2\text{O})_2^{3-}$**

| Atom | X         | Y         | Z         | Mulliken charge |
|------|-----------|-----------|-----------|-----------------|
| Eu   | -0.043720 | -0.093390 | -0.401370 | 1.810           |
| C    | 1.473718  | 2.349583  | 1.084027  | 0.271           |
| O    | 1.134836  | 1.135481  | 1.253756  | -0.526          |
| O    | 2.018896  | 3.076350  | 1.918851  | -0.549          |
| C    | 1.152235  | 2.943493  | -0.320850 | 0.299           |
| O    | 1.423375  | 4.122653  | -0.549520 | -0.541          |
| O    | 0.613048  | 2.125858  | -1.138960 | -0.582          |
| C    | -3.175740 | -0.952430 | 0.116517  | 0.283           |
| O    | -2.088880 | -1.442190 | -0.333250 | -0.573          |
| O    | -4.288380 | -1.477870 | 0.052973  | -0.540          |
| C    | -3.042400 | 0.447239  | 0.790789  | 0.294           |
| O    | -4.067610 | 1.028580  | 1.149868  | -0.535          |
| O    | -1.849530 | 0.883562  | 0.918551  | -0.572          |
| C    | 2.889015  | -1.463240 | -0.394820 | 0.290           |
| O    | 2.187686  | -0.633960 | -1.055380 | -0.547          |
| O    | 4.075491  | -1.737590 | -0.594110 | -0.552          |
| C    | 2.145120  | -2.177380 | 0.773414  | 0.304           |
| O    | 2.768960  | -2.948680 | 1.502184  | -0.541          |



|   |           |           |           |        |
|---|-----------|-----------|-----------|--------|
| O | 0.905573  | -1.887290 | 0.873865  | -0.578 |
| O | -1.540380 | 1.090219  | -2.234370 | -0.684 |
| H | -1.345920 | 0.678279  | -3.086910 | 0.380  |
| O | -0.391030 | -1.943490 | -2.247060 | -0.690 |
| H | -1.268320 | -2.034960 | -1.823010 | 0.370  |
| O | -0.948430 | -1.146510 | 2.807931  | -0.755 |
| H | -1.214680 | -0.356570 | 2.309636  | 0.356  |
| H | -0.247640 | -1.521000 | 2.240909  | 0.357  |
| H | -0.578300 | -1.525450 | -3.097700 | 0.383  |
| H | -0.871360 | 1.798661  | -2.153730 | 0.372  |

**Table S7b. Detailed bond length and bond order information of  $\text{Eu}(\text{Ox})_3(\text{H}_2\text{O})_2^{3-}$**

| Central atom | Coordination atom | Bond length | Mayer bond order |
|--------------|-------------------|-------------|------------------|
| Eu           | O3                | 2.375       | 0.315            |
| Eu           | O7                | 2.429       | 0.261            |
| Eu           | O9                | 2.451       | 0.257            |
| Eu           | O13               | 2.441       | 0.250            |
| Eu           | O15               | 2.387       | 0.302            |
| Eu           | O19               | 2.397       | 0.274            |
| Eu           | O20               | 2.646       | 0.188            |
| Eu           | O22               | 2.636       | 0.178            |
